# Supplementary material for: Synthesis of New Benzothiazole Acylhydrazones as Anticancer Agents
Source: MDPI journal article supplement (doi:10.3390/molecules23051054), 2018-05-01
Supplement: s1 [file s1]

## DOPNALAB

| Item               | Value                                              |
|--------------------|----------------------------------------------------|
| Acquired Date&Time | 23.12.2016 15:53:23                                |
| Acquired by        | System Administrator                               |
| Filename           | C:\Users\dopnalab\Desktop\derya\ZD seri\ZD-61.ispd |
| Spectrum name      | ZD-61                                              |
| Sample name        | ZD-6                                               |
| Sample ID          |                                                    |
| Option             |                                                    |
| Comment            |                                                    |
| No. of Scans       | 10                                                 |
| Resolution         | 4 [cm-1]                                           |
| Apodization        | Happ-Genzel                                        |

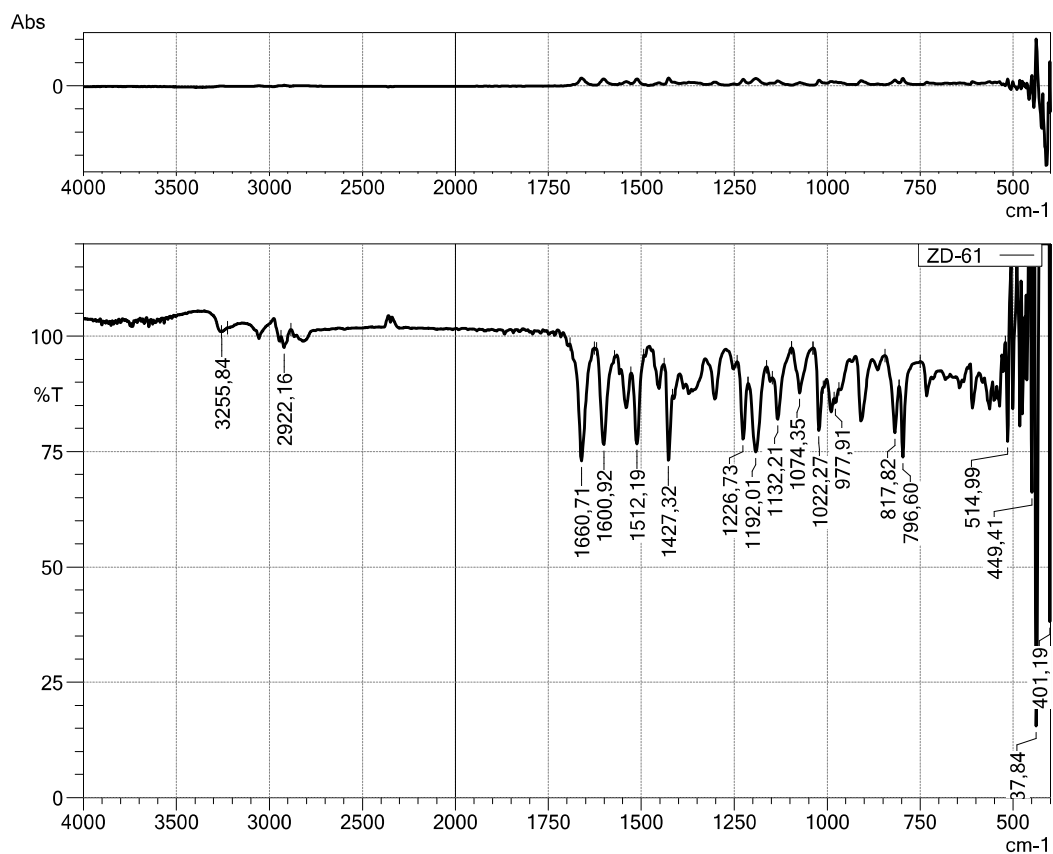

**Spectra 1.** Compound **4d** IR spectra.

Data File: C:\LabSolutions\Data\Analiz\derya\ZD-6\_33.lcd

| Elmt | Val. | Min | Max | Use Adduct |
|------|------|-----|-----|------|------|-----|-----|------|------|-----|-----|------|------|-----|-----|------------|
| H    | 1    | 4   | 30  | O    | 2    | 1   | 3   | S    | 2    | 0   | 3   | Ru   | 2    | 0   | 0   | H          |
| C    | 4    | 5   | 33  | F    | 1    | 0   | 0   | Cl   | 1    | 0   | 1   | I    | 3    | 0   | 0   |            |
| N    | 3    | 2   | 5   | P    | 3    | 0   | 0   | Br   | 1    | 0   | 0   |      |      |     |     |            |

Error Margin (ppm): 15

DBE Range: 10.0 - 15.0

Electron Ions: both

HC Ratio: unlimited

Apply N Rule: yes

Use MSn Info: no

Max Isotopes: 3

Isotope RI (%): 1.00

Isotope Res: 10000

MSn Iso RI (%): 10.00

MSn Logic Mode: AND

Max Results: 500

Event#: 1 MS(E+) Ret. Time : 9.160 -&gt; 9.160 Scan#: 1375 -&gt; 1375

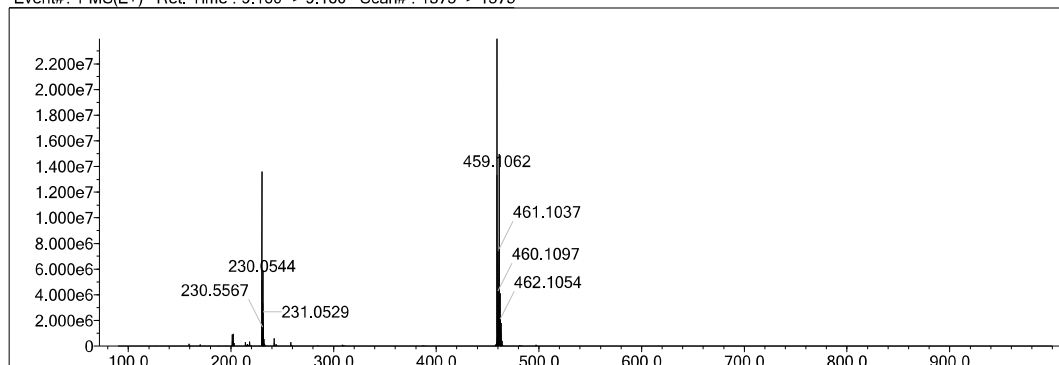

Measured region for 459.1062 m/z

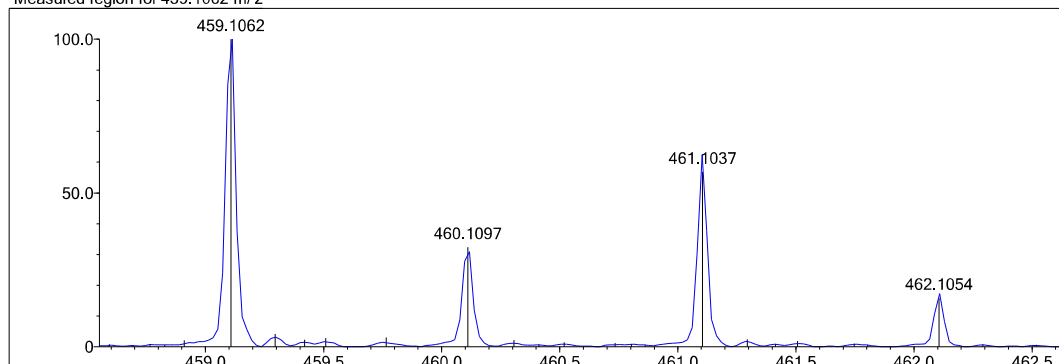

C22 H23 N4 O S2 Cl [M+H]+ : Predicted region for 459.1075 m/z

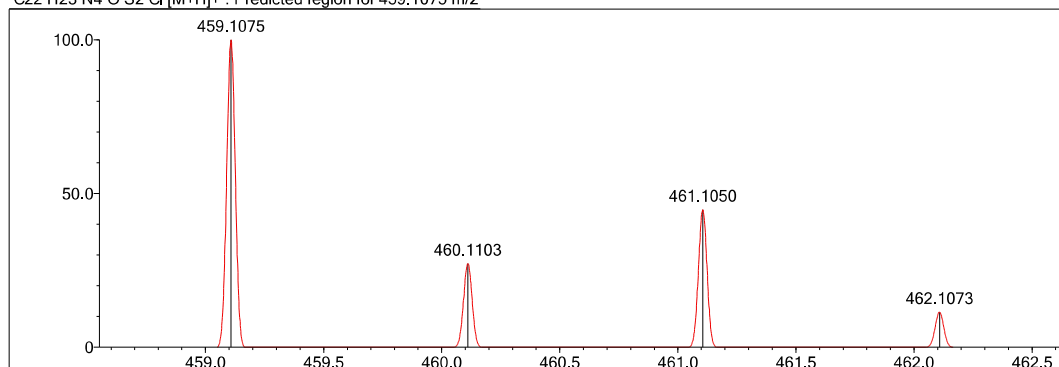

| Rank | Score | Formula (M)        | Ion    | Meas. m/z | Pred. m/z | Df. (mDa) | Df. (ppm) | Iso   | DBE  |
|------|-------|--------------------|--------|-----------|-----------|-----------|-----------|-------|------|
| 1    | 64.71 | C22 H23 N4 O S2 Cl | [M+H]+ | 459.1062  | 459.1075  | -1.3      | -2.83     | 67.81 | 13.0 |

## Spectra 2. Compound 4d HRMS spectra.

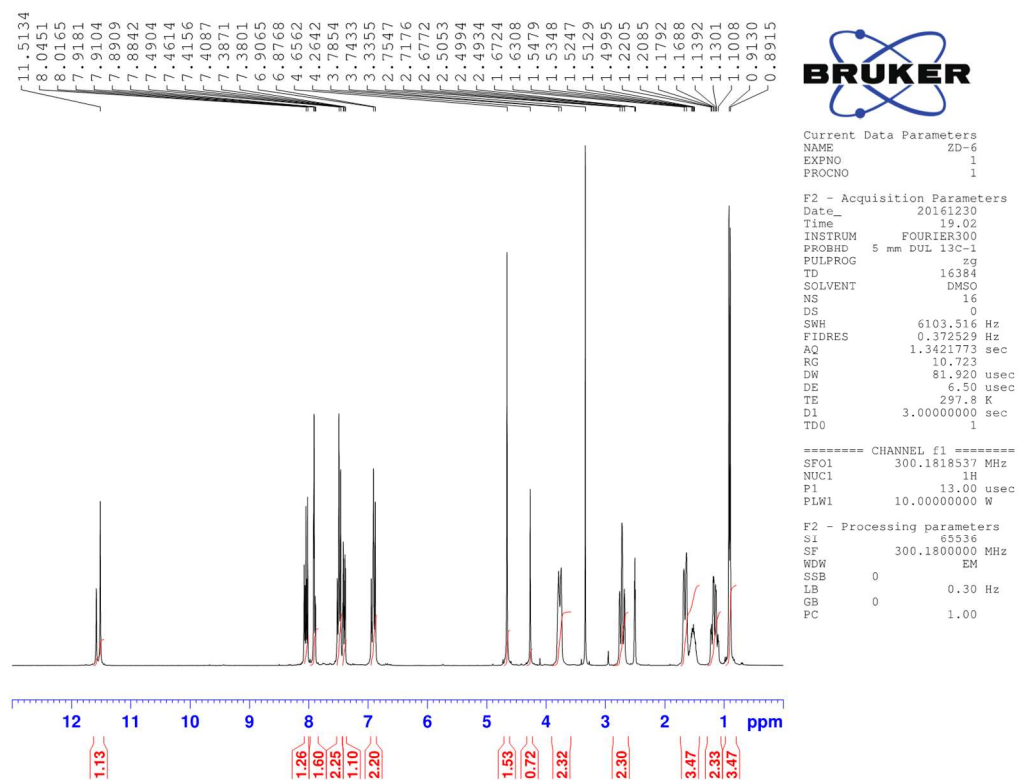

**Spectra 3.** Compound **4d**  $^1\text{H}$ -NMR spectra.

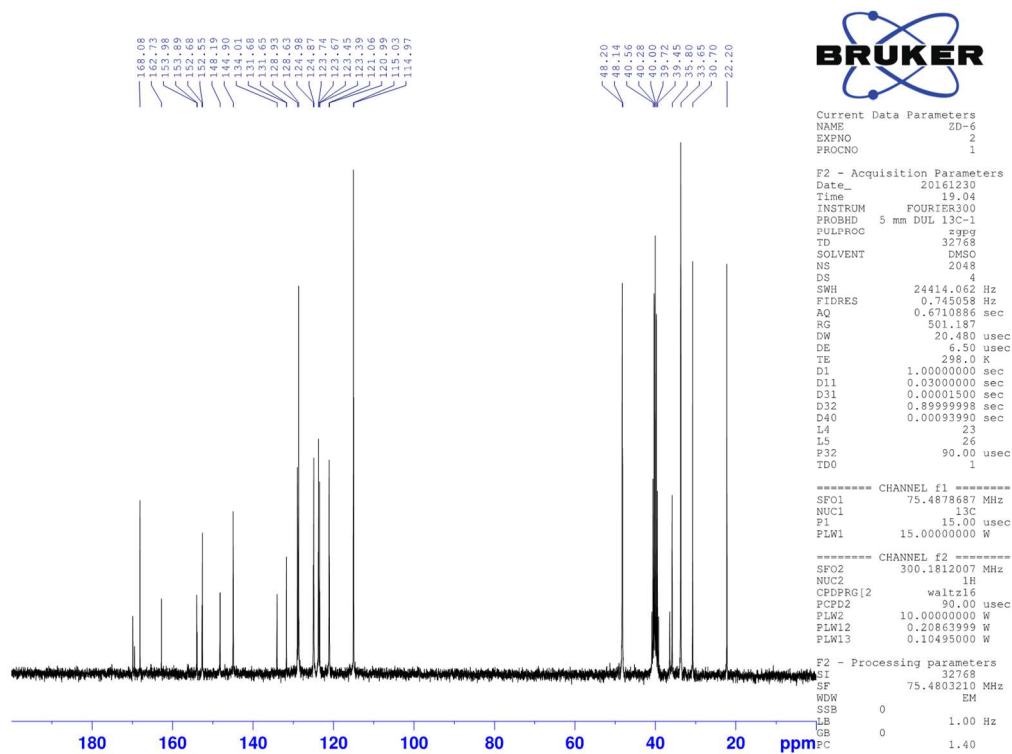

**Spectra 4.** Compound **4d**  $^{13}\text{C}$ -NMR spectra.

## DOPNALAB

| Item               | Value                                              |
|--------------------|----------------------------------------------------|
| Acquired Date&Time | 23.12.2016 15:03:05                                |
| Acquired by        | System Administrator                               |
| Filename           | C:\Users\dopnalab\Desktop\derya\ZD seri\ZD-21.ispd |
| Spectrum name      | ZD-21                                              |
| Sample name        | ZD-2                                               |
| Sample ID          |                                                    |
| Option             |                                                    |
| Comment            |                                                    |
| No. of Scans       | 10                                                 |
| Resolution         | 4 [cm-1]                                           |
| Apodization        | Happ-Genzel                                        |

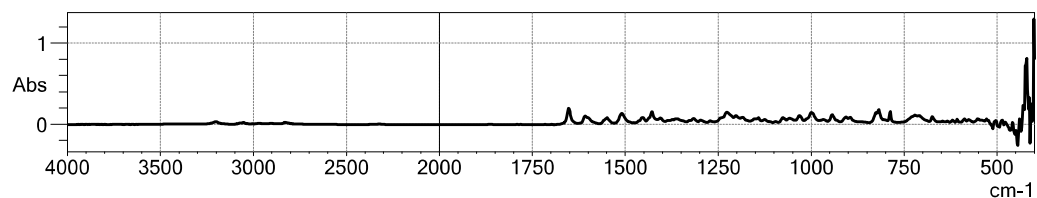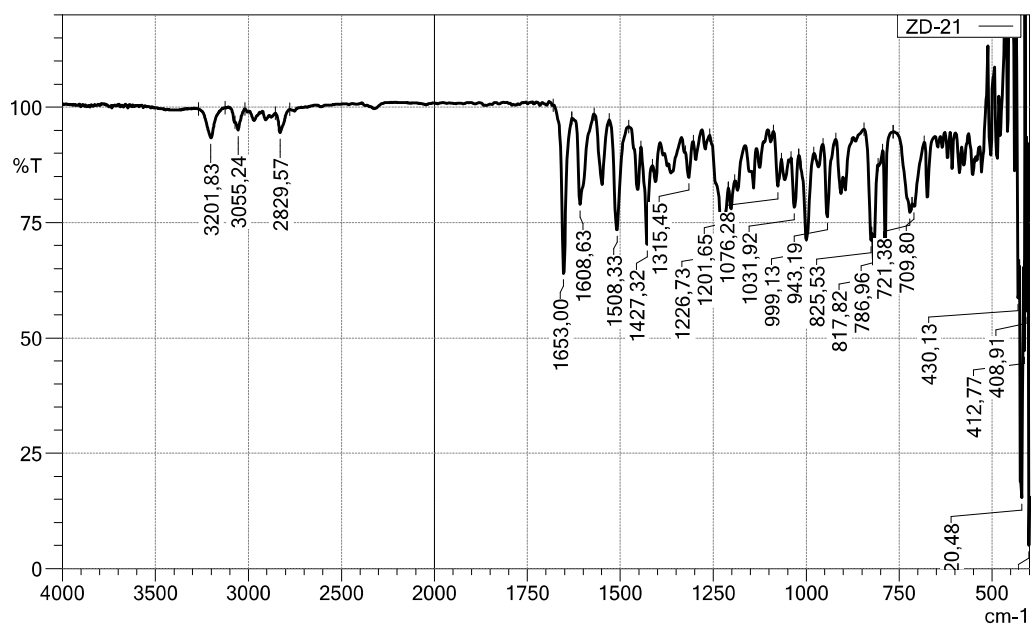

**Spectra 5.** Compound **4e** IR spectra.

Data File: C:\LabSolutions\Data\Analiziderya\ZD-2\_29.lcd

| Elmt | Val. | Min | Max | Use Adduct |
|------|------|-----|-----|------|------|-----|-----|------|------|-----|-----|------|------|-----|-----|------------|
| H    | 1    | 4   | 30  | O    | 2    | 1   | 3   | S    | 2    | 0   | 3   | Ru   | 2    | 0   | 0   | H          |
| C    | 4    | 5   | 33  | F    | 1    | 0   | 0   | Cl   | 1    | 0   | 1   | I    | 3    | 0   | 0   |            |
| N    | 3    | 2   | 6   | P    | 3    | 0   | 0   | Br   | 1    | 0   | 0   |      |      |     |     |            |

Error Margin (ppm): 15

DBE Range: 15.0 - 18.0

Electron Ions: both

HC Ratio: unlimited

Apply N Rule: yes

Use MSn Info: no

Max Isotopes: 3

Isotope RI (%): 1.00

Isotope Res: 10000

MSn Iso RI (%): 10.00

MSn Logic Mode: AND

Max Results: 500

Event#: 1 MS(E+) Ret. Time : 8.320 -&gt; 8.320 Scan#: 1249 -&gt; 1249

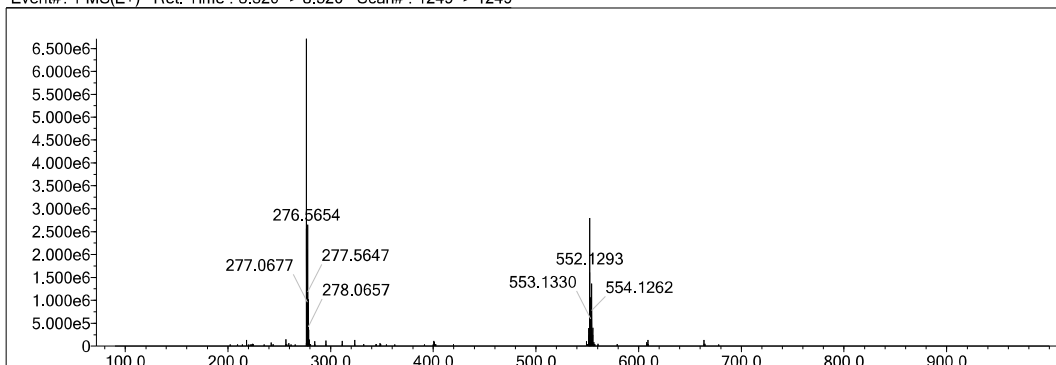

Measured region for 552.1293 m/z

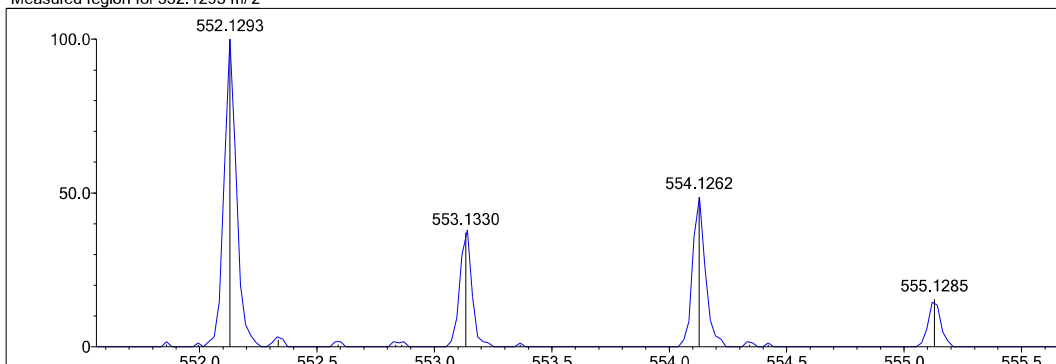

C27 H26 N5 O2 S2 Cl [M+H]+ : Predicted region for 552.1289 m/z

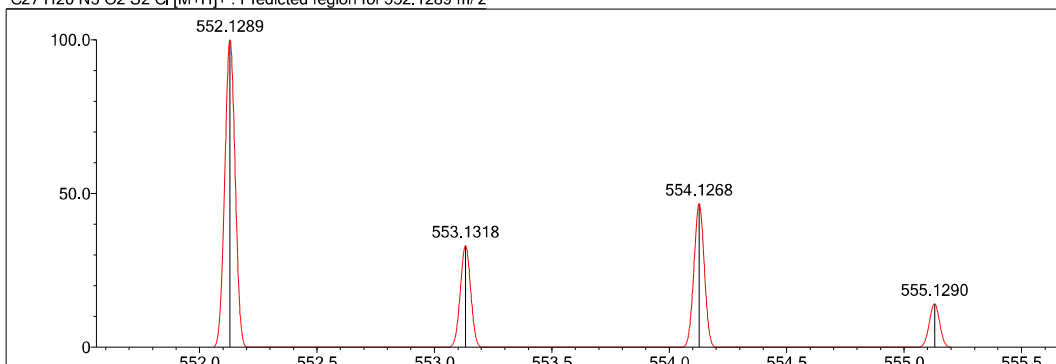

| Rank | Score  | Formula (M)         | Ion                | Meas. m/z | Pred. m/z | Df. (mDa) | Df. (ppm) | Iso    | DBE  |
|------|--------|---------------------|--------------------|-----------|-----------|-----------|-----------|--------|------|
| 1    | 100.00 | C27 H26 N5 O2 S2 Cl | [M+H] <sup>+</sup> | 552.1293  | 552.1289  | 0.4       | 0.72      | 100.00 | 17.0 |

Spectra 6. Compound 4e HRMS spectra.

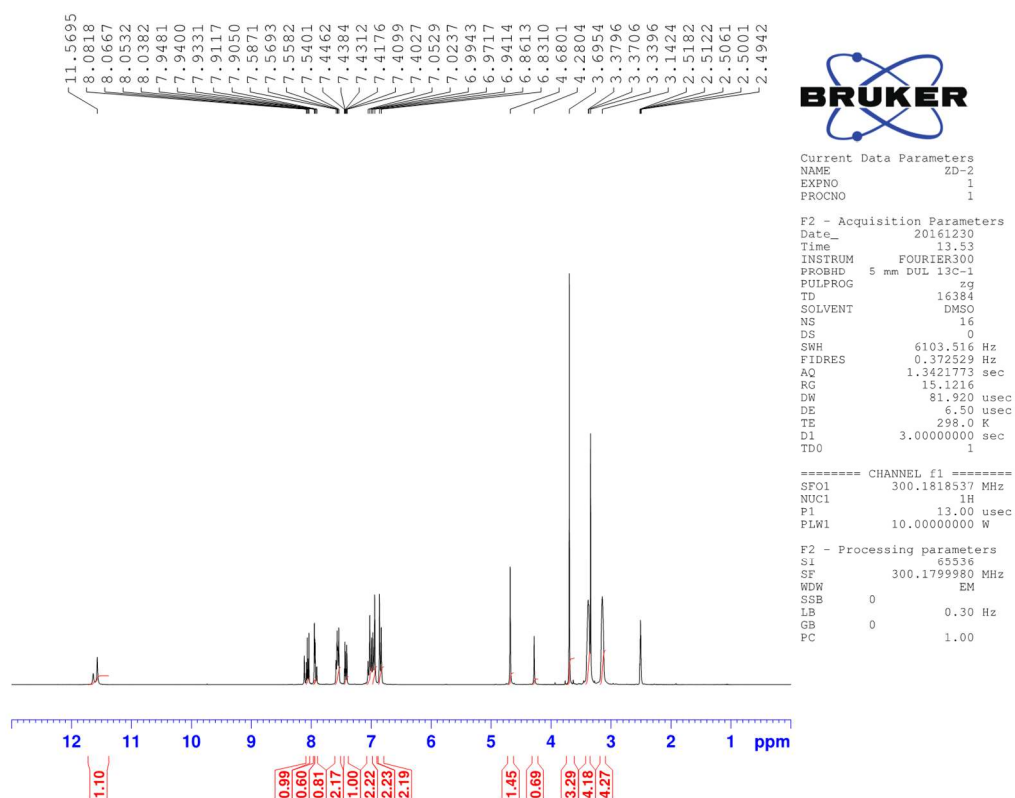

Spectra 7. Compound **4e**  $^1\text{H}$ -NMR spectra.

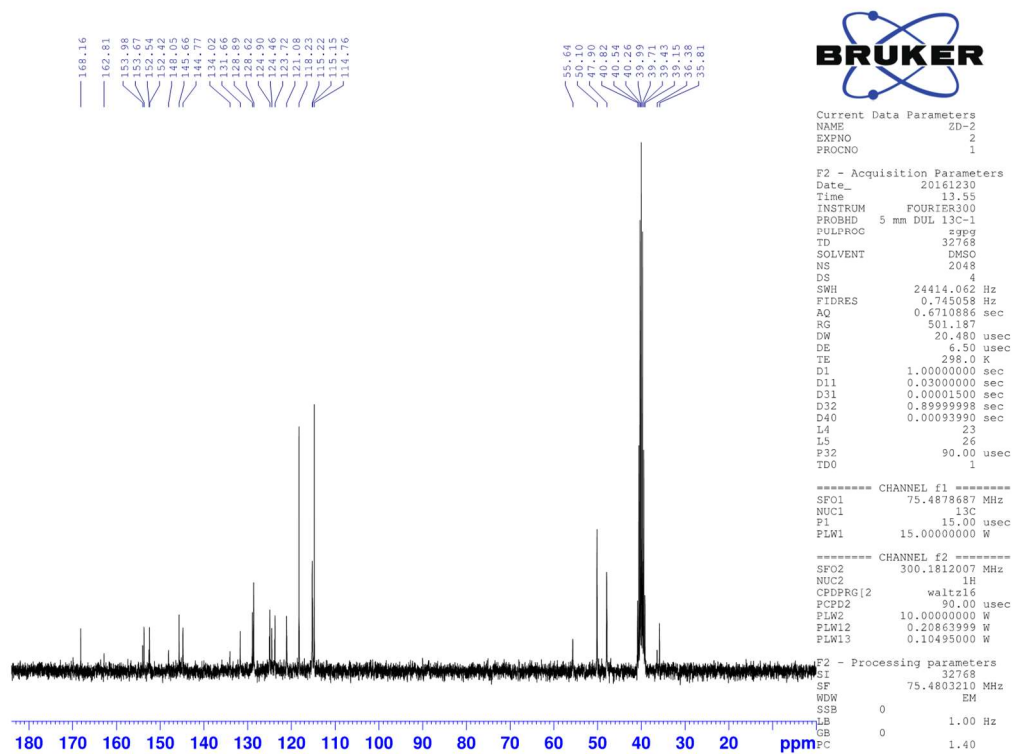

Spectra 8. Compound **4e**  $^{13}\text{C}$ -NMR spectra.

## DOPNALAB

| Item               | Value                                               |
|--------------------|-----------------------------------------------------|
| Acquired Date&Time | 23.12.2016 16:04:09                                 |
| Acquired by        | System Administrator                                |
| Filename           | C:\Users\dopnalab\Desktop\derya\ZD seri\ZD-111.ispd |
| Spectrum name      | ZD-111                                              |
| Sample name        | ZD-11                                               |
| Sample ID          |                                                     |
| Option             |                                                     |
| Comment            |                                                     |
| No. of Scans       | 10                                                  |
| Resolution         | 4 [cm-1]                                            |
| Apodization        | Happ-Genzel                                         |

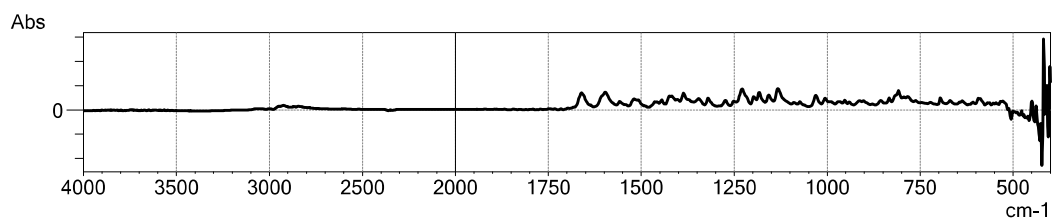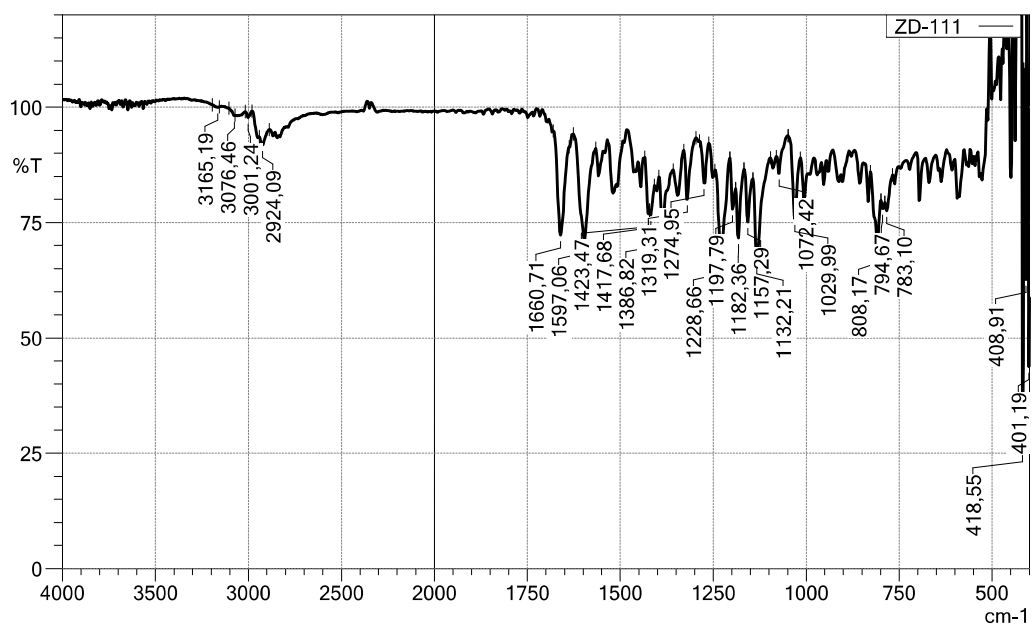

**Spectra 9.** Compound **4h** IR spectra.

Data File: C:\LabSolutions\Data\Analiziderya\ZD-11\_38.lcd

| Elmt | Val. | Min | Max | Use Adduct |
|------|------|-----|-----|------|------|-----|-----|------|------|-----|-----|------|------|-----|-----|------------|
| H    | 1    | 4   | 30  | O    | 2    | 1   | 3   | S    | 2    | 0   | 3   | Ru   | 2    | 0   | 0   | H          |
| C    | 4    | 5   | 33  | F    | 1    | 0   | 0   | Cl   | 1    | 0   | 0   | I    | 3    | 0   | 0   |            |
| N    | 3    | 2   | 5   | P    | 3    | 0   | 0   | Br   | 1    | 0   | 0   |      |      |     |     |            |

Error Margin (ppm): 10

DBE Range: 10.0 - 15.0

Electron Ions: both

HC Ratio: unlimited

Apply N Rule: yes

Use MSn Info: no

Max Isotopes: 3

Isotope RI (%): 1.00

Isotope Res: 10000

MSn Iso RI (%): 10.00

MSn Logic Mode: AND

Max Results: 500

Event#: 1 MS(E+) Ret. Time : 8.627 Scan#: 1295

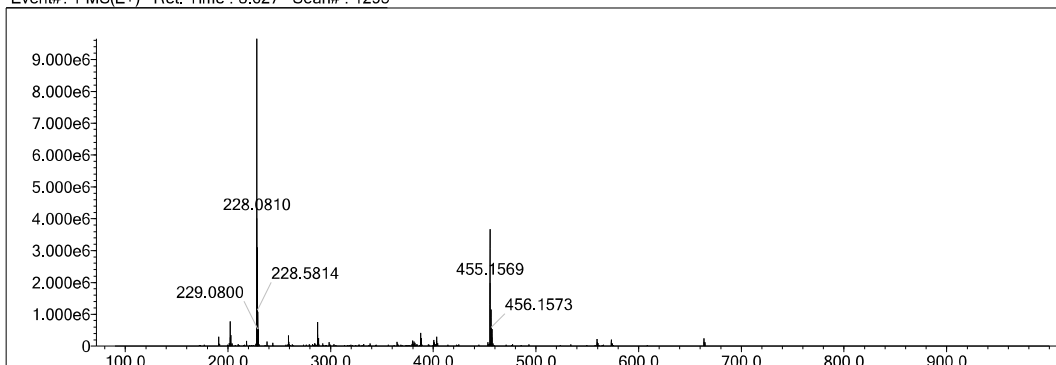

Measured region for 455.1569 m/z

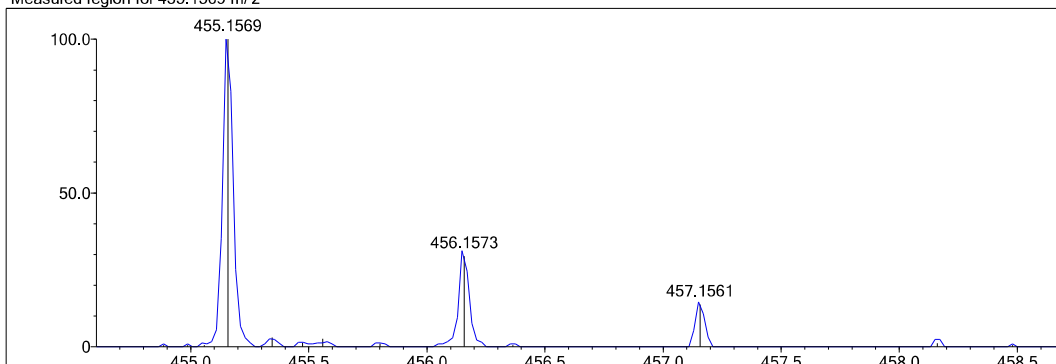

C23 H26 N4 O2 S2 [M+H]+ : Predicted region for 455.1570 m/z

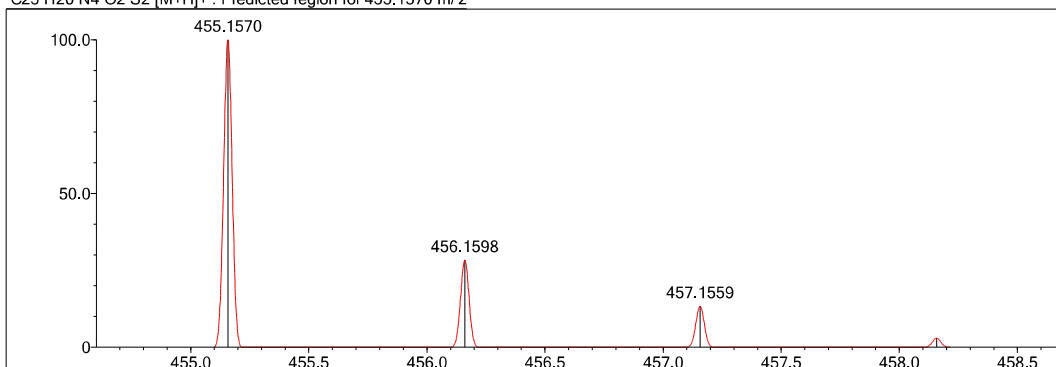

| Rank | Score | Formula (M)      | Ion                | Meas. m/z | Pred. m/z | Df. (mDa) | Df. (ppm) | Iso   | DBE  |
|------|-------|------------------|--------------------|-----------|-----------|-----------|-----------|-------|------|
| 1    | 83.68 | C23 H26 N4 O2 S2 | [M+H] <sup>+</sup> | 455.1569  | 455.1570  | -0.1      | -0.22     | 83.68 | 13.0 |

Spectra 10. Compound **4h** HRMS spectra.



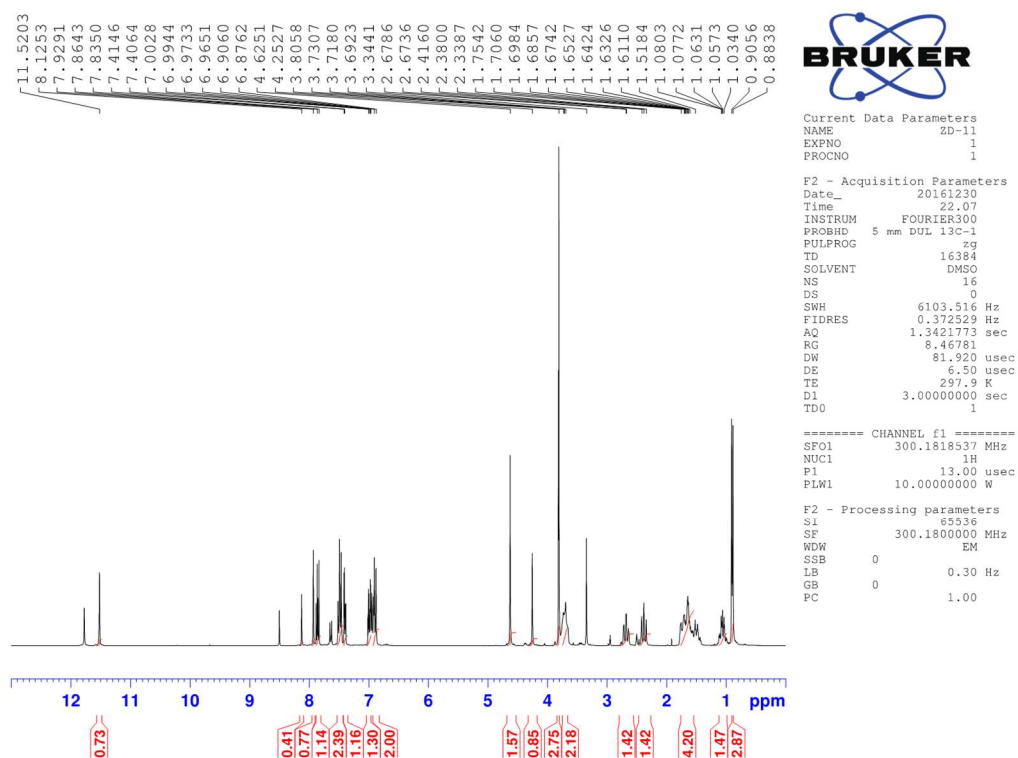

Spectra 11. Compound **4h**  $^1\text{H}$ -NMR spectra.

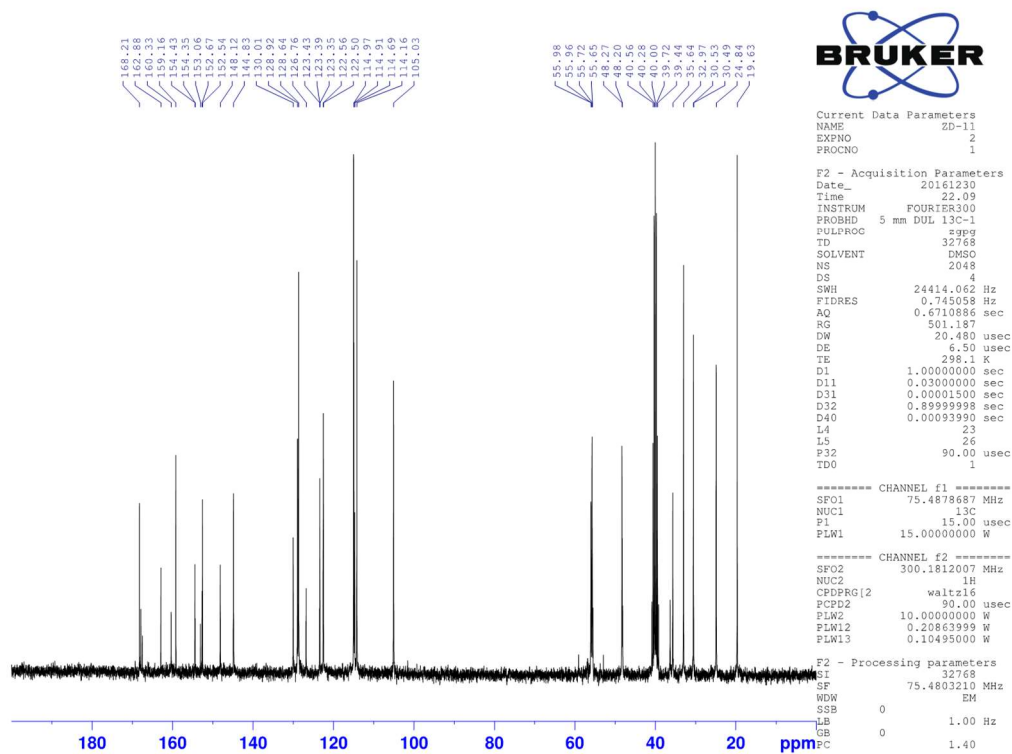

Spectra 12. Compound **4h**  $^{13}\text{C}$ -NMR spectra.
